# Supplementary material for: Injectable biocompatible hydrogels with tunable strength based on crosslinked supramolecular polymer nanofibers
Source: Royal Society of Chemistry journal article supplement (doi:10.1039/d4tb01873g), 2024-12-20
Supplement: d4tb01873g1.pdf [file d4tb01873g1.pdf]

## Supplementary information for

### **Injectable biocompatible hydrogels with tunable strength based on crosslinked supramolecular polymer nanofibers**

Hans F. Ulrich,<sup>a,b</sup> Ceren C. Pihlamagi,<sup>a,b</sup> Tobias Klein,<sup>a,b</sup> Camille Bakkali-Hassani,<sup>c</sup> Sylvain Catrouillet,<sup>c</sup> Johannes C. Brendel,<sup>a,b,d,e,\*</sup>

a Laboratory of Organic and Macromolecular Chemistry (IOMC), Friedrich Schiller University Jena, Humboldtstr. 10, 07743 Jena, Germany

b Jena Center for Soft Matter (JCSM), Friedrich Schiller University Jena, Philosophenweg 7, 07743 Jena, Germany

c ICGM, Univ. Montpellier, CNRS, ENSCM, 34095 Montpellier, France

d Macromolecular Chemistry I, University of Bayreuth, Universitätsstr. 30, 95447 Bayreuth, Germany

e Institute of Macromolecular Research (BIMF) and Bavarian Polymer Institute (BPI), University of Bayreuth, Universitätsstr. 30, 95447 Bayreuth, Germany

\*corresponding author: johannes.brendel@uni-jena.de

## Content

|                                               |    |
|-----------------------------------------------|----|
| 1. Synthesis .....                            | 2  |
| 2. Characterisation .....                     | 4  |
| 2.1 Size exclusion chromatography (SEC) ..... | 4  |
| 2.2 Rheologie Measurments.....                | 5  |
| 2.3 Biocompatibility tests .....              | 14 |
| 3. Injection parameter calculation.....       | 15 |
| 4. References.....                            | 16 |

# 1. Synthesis

## Synthetic routes

The synthesis route for the BTU and BTP core units was done according to the before published procedures.<sup>[1]</sup>

## Synthetic protocols

### Crosslinker Synthesis

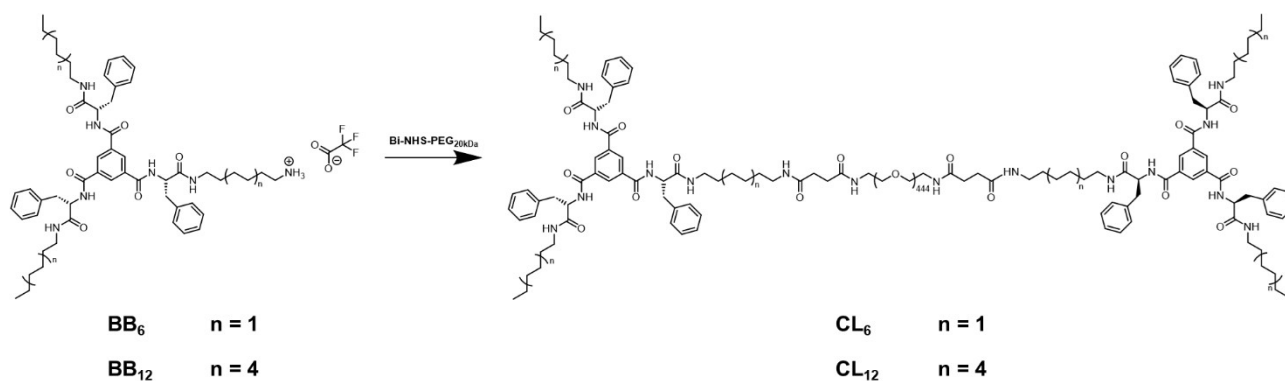

**Figure S1:** Synthesis route for the Crosslinker unites of BTP-C<sub>6</sub> (CL<sub>6</sub>) and BTP-C<sub>12</sub> (CL<sub>12</sub>).

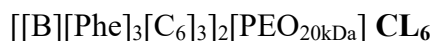

The starting material BB<sub>6</sub> (25 mg, 0.024 mmol, 2.0 eq) and di-NHS-PEO<sub>20kDa</sub> (243 mg, 0.012 μmol, 1 eq) were dissolved in 0.6 mL DMF. To this solution, 15 μL of triethylamine (0.104 mmol, 10 eq) were added and the mixture was stirred for 24 h at rt. After checking the conversion via SEC, the reaction mixture was diluted slowly with 20 mL water to obtain a rough concentration of 10 mg mL<sup>-1</sup>. The obtained solution was dialysed (8 kDa cutoff) to remove traces of DMF and lyophilized.

**Yield:** 224.5 mg, 10.47 μmol (86%), white powder.

**<sup>1</sup>H-NMR (300 MHz, d<sub>6</sub>-DMSO, 298 K):** δ [ppm] = 8.67 - 8.76 (m, 6 H, NH), 8.27 - 8.32 (m, 6 H, CH<sub>aromat</sub>), 8.09 (br s, 6 H, NH), 7.86 (t, 2 H, NH), 7.76 (m, 2 H, NH), 7.15 - 7.35 (m, 28 H, CH<sub>aromat</sub>), 4.66 - 4.78 (m, 6 H, CH), 3.70 - 3.81 (m, 15 H, CH<sub>2</sub>), 3.39 - 3.67 (m, 2357 H, PEO), 2.97 - 3.20 (m, 32 H, CH<sub>2</sub>) 2.28 (m, 9 H, CH<sub>2</sub>) 1.36 (br s, 14 H, CH<sub>2</sub>) 1.23 (br s, 34 H, CH<sub>2</sub>) 0.84 (br t, *J*=6.51 Hz, 12 H, CH<sub>3</sub>)

**SEC (DMAc + 0.21 wt.% LiCl):** M<sub>n</sub> = 20.424 g mol<sup>-1</sup>; M<sub>w</sub> = 24.450 g mol<sup>-1</sup>; Đ = 1.19

[[B][Phe]<sub>3</sub>[C<sub>12</sub>]<sub>3</sub>]<sub>2</sub>[PEO<sub>20kDa</sub>] **CL**<sub>12</sub>

**CL**<sub>12</sub> was synthesised using according to the procedure of compound **CL**<sub>6</sub> using **BB**<sub>12</sub> as starting material.

**Yield:** 217.2 mg, 9.90 μmol (85%), white powder.

**<sup>1</sup>H-NMR (300 MHz, d<sub>6</sub>-DMSO, 298 K):** δ [ppm] = 8.70 (t, 6 H, NH) 8.27 (m, 6 H, CH<sub>aromat</sub>) 8.08 (s, 6 H, NH) 7.86 (t, 2 H, NH) 7.74 (t, 2 H, NH) 7.29 - 7.15 (m, 30 H, CH<sub>aromat</sub>), 4.73 (m, 6 H, CH) 3.69 - 3.78 (m, 10 H, CH<sub>2</sub>) 3.51 (s, 2340 H, PEO) 3.18 - 2.92 (m, 24 H, CH<sub>2</sub>) 2.27 (s, 11 H, CH<sub>2</sub>) 1.36 (m, 16 H, CH<sub>2</sub>) 1.22 (s, 114 H, CH<sub>2</sub>) 0.75 - 0.91 (t, 12 H, CH<sub>3</sub>)

**SEC (DMAc + 0.21 wt.% LiCl):** M<sub>n</sub> = 24.832 g mol<sup>-1</sup>; M<sub>w</sub> = 31.275 g mol<sup>-1</sup>; Đ = 1.26

## 2. Characterisation

### 2.1 Size exclusion chromatography (SEC)

Size exclusion chromatography (SEC) of polymers was performed on an Agilent system (series 1200) equipped with a PSS degasser, a G1310A pump, a G1362A refractive index detector and a PSS GRAM 30 and 1000 column with DMAc (+ 0.21wt% LiCl) as eluent at a flow rate of 1 mL min<sup>-1</sup>. The column oven was set to 40 °C and polymethyl methacrylate (PMMA) standards were used for calibration.

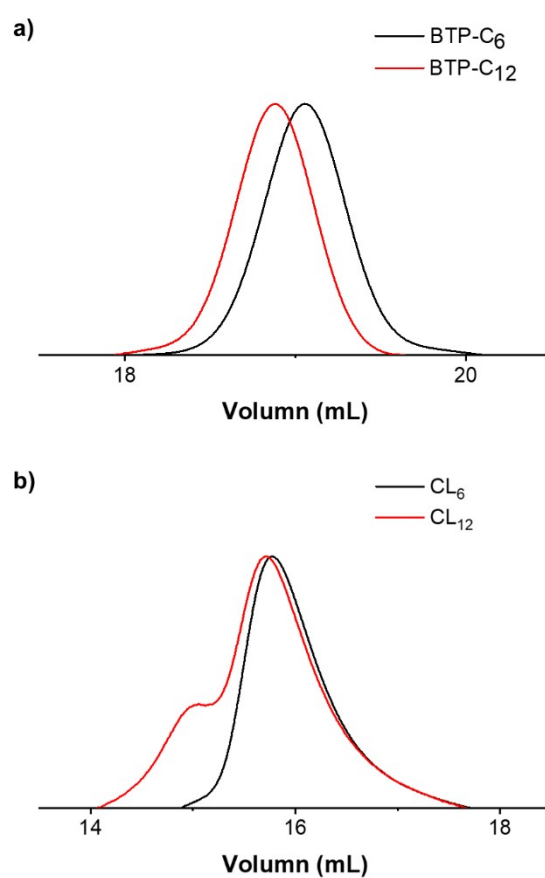

**Figure S2:** Overview of SEC measurements, showing elugrams of the BTP-Monomer (a) and BTP-Crosslinker units (b). Measured using DMAc (+ 0.21wt% LiCl) as eluent and a flow rate of 1 mL min<sup>-1</sup>.

## 2.2 Rheologic Measurements

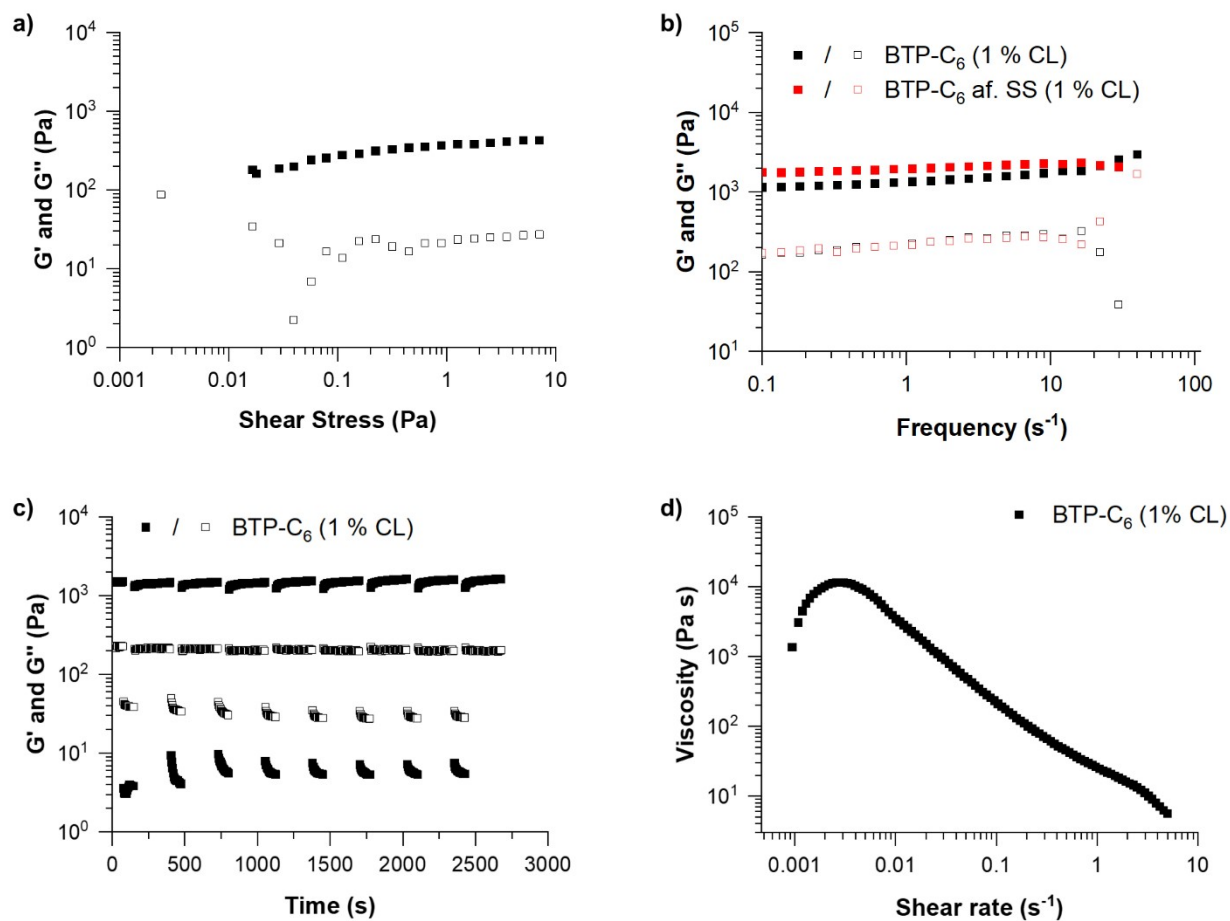

**Figure S3:** Stress sweep (a), Frequency sweep (b) before (black) and after (red) step strain measurements (c) and shear-viscosity measurements (d) of BTP-C<sub>6</sub>. The sample was prepared using a solvent switch from THF and contained 2.5 w% BTP-C<sub>6</sub> with 1 mol% CL<sub>6</sub>.

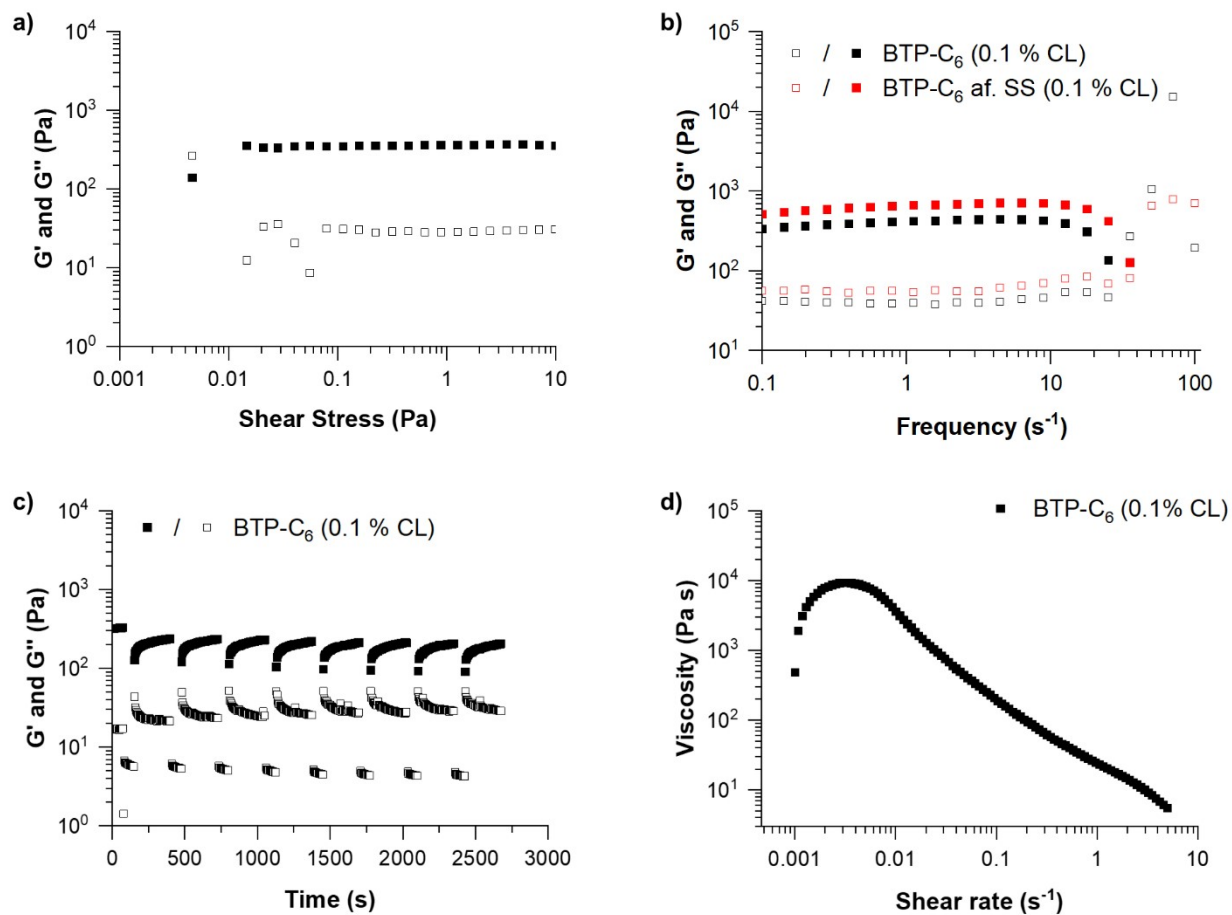

**Figure S4:** Stress sweep (a), Frequency sweep (b) before (black) and after (red) step strain measurements (c) and shear-viscosity measurements (d) of BTP-C<sub>6</sub>. The sample was prepared using a solvent switch from THF and contained 2.5 w% BTP-C<sub>6</sub> with 0.1 mol% CL<sub>6</sub>.

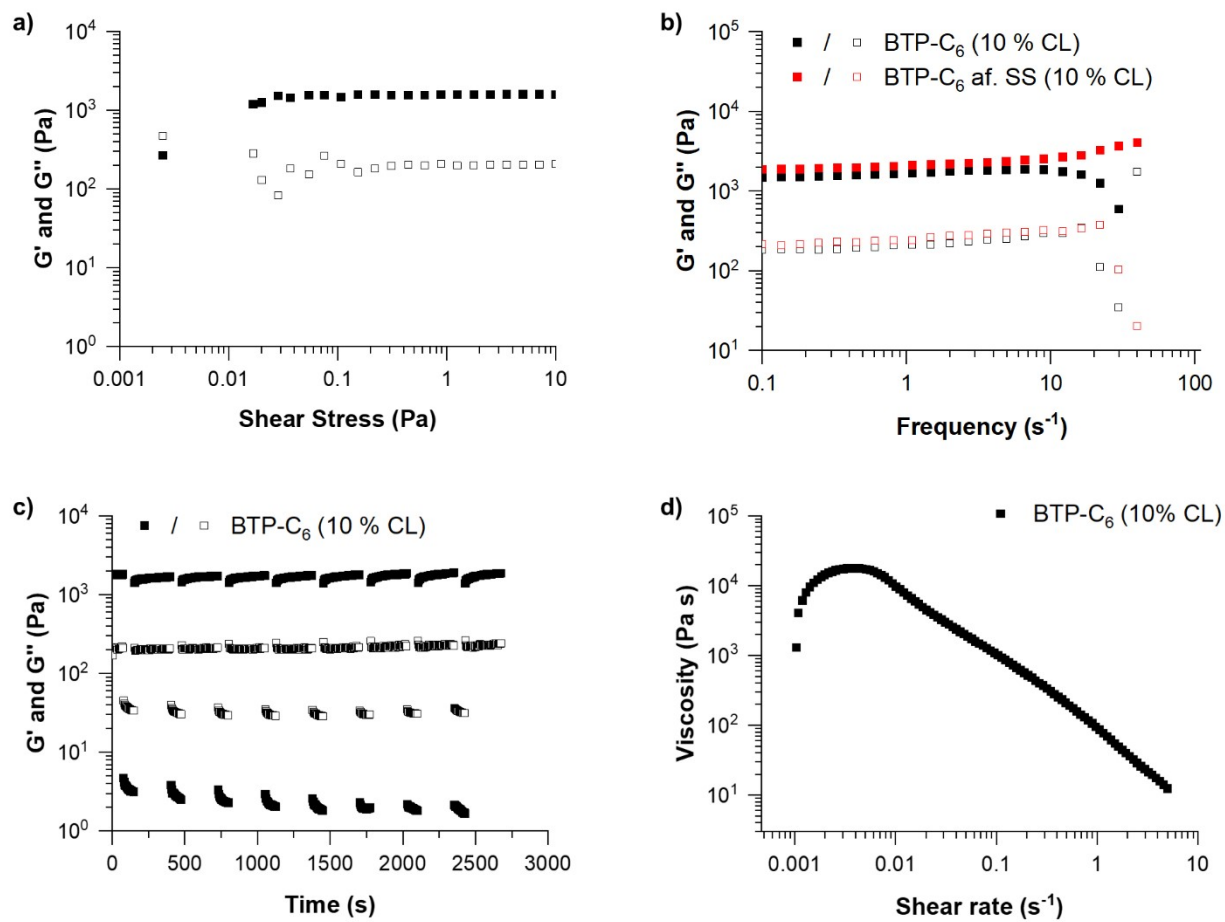

**Figure S5:** Stress sweep (a), Frequency sweep (b) before (black) and after (red) step strain measurements (c) and shear-viscosity measurements (d) of BTP-C<sub>6</sub>. The sample was prepared using a solvent switch from THF and contained 2.5 w% BTP-C<sub>6</sub> with 10 mol% CL<sub>6</sub>.



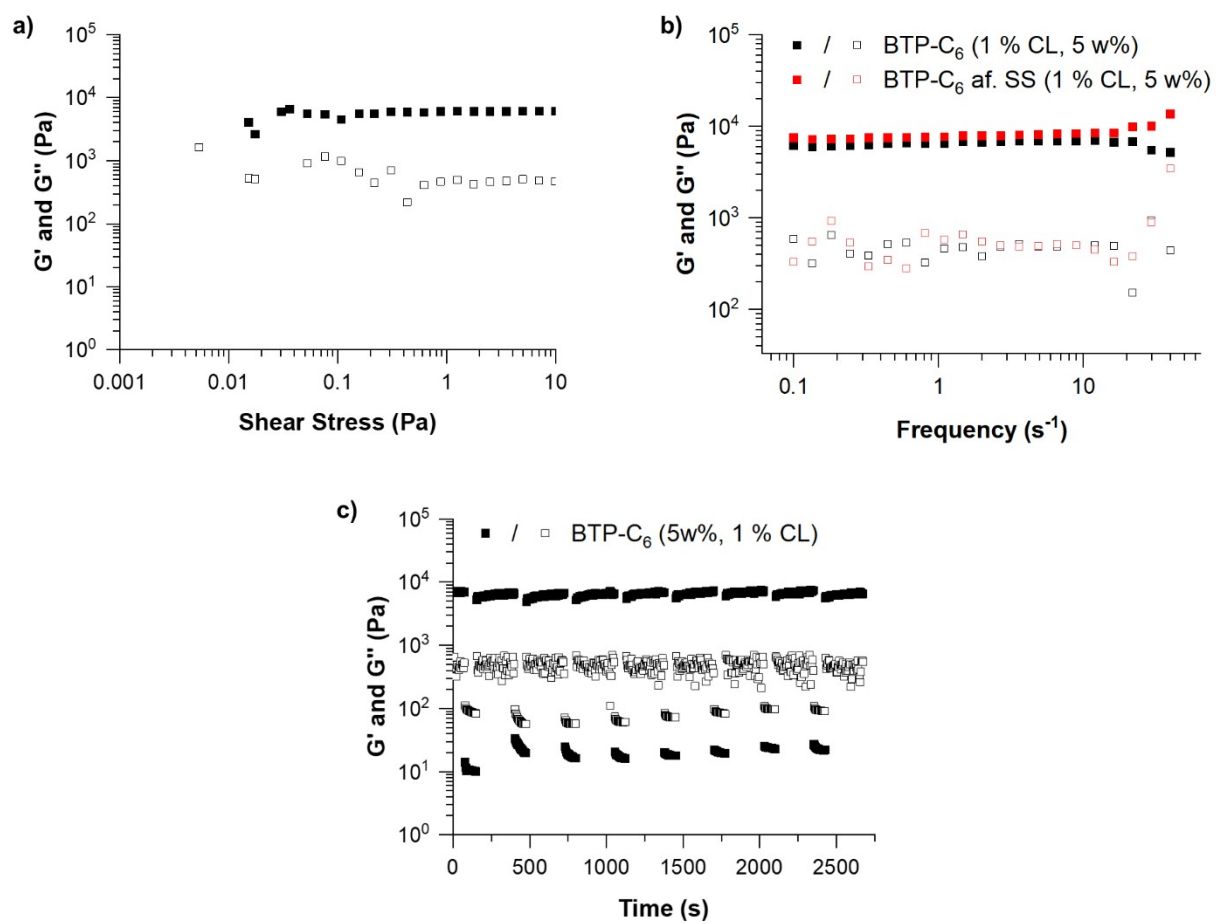

**Figure S6:** Stress sweep (a), Frequency sweep (b) before (black) and after (red) step strain measurements (c) of BTP-C<sub>6</sub>. The sample was prepared using a solvent switch from THF and contained 5 w% BTP-C<sub>6</sub> with 1 mol% CL<sub>6</sub>.

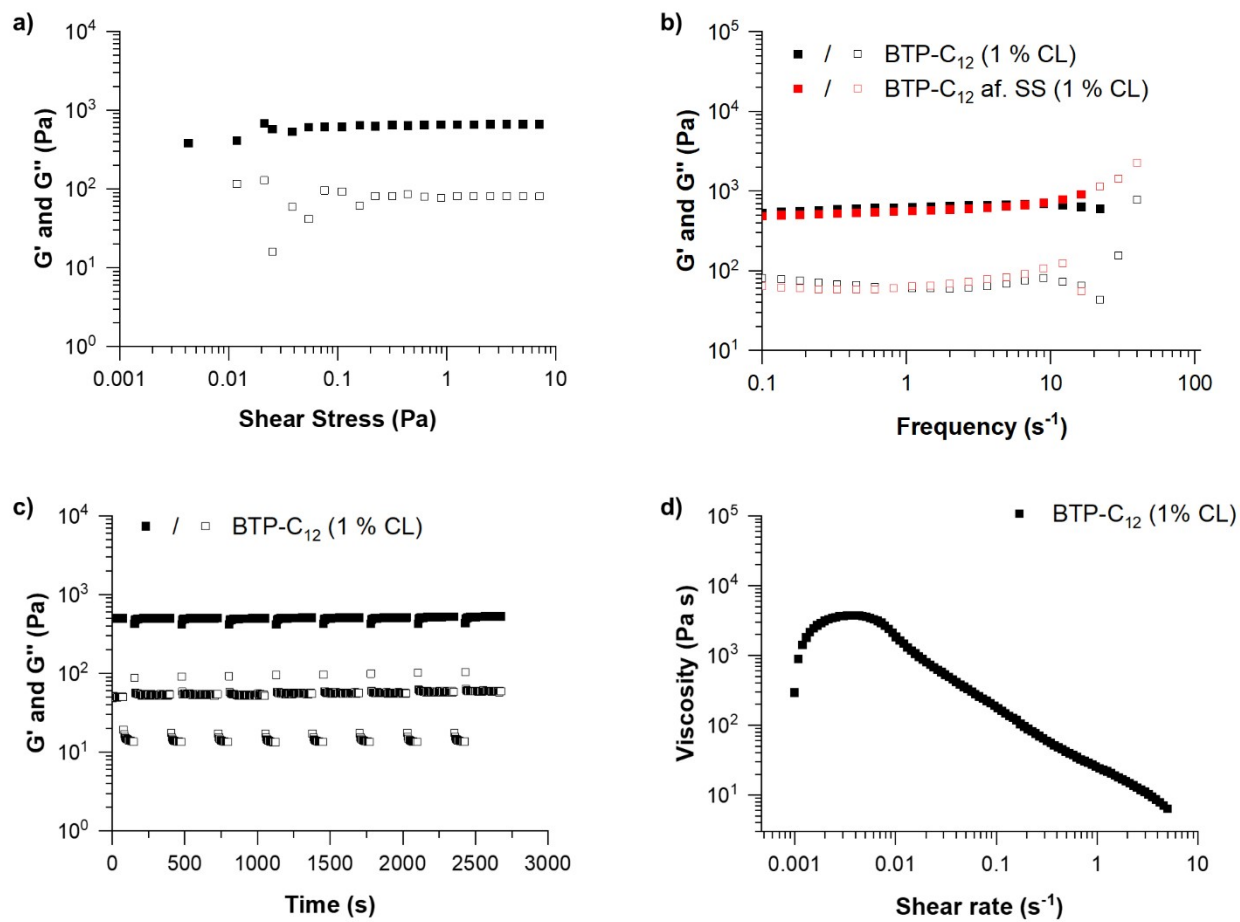

**Figure S7:** Stress sweep (a), Frequency sweep (b) before (black) and after (red) step strain measurements (c) and shear-viscosity measurements (d) of BTP-C<sub>12</sub>. The sample was prepared using a solvent switch from THF and contained 2.5 w% BTP-C<sub>12</sub> with 1 mol% CL<sub>12</sub>.

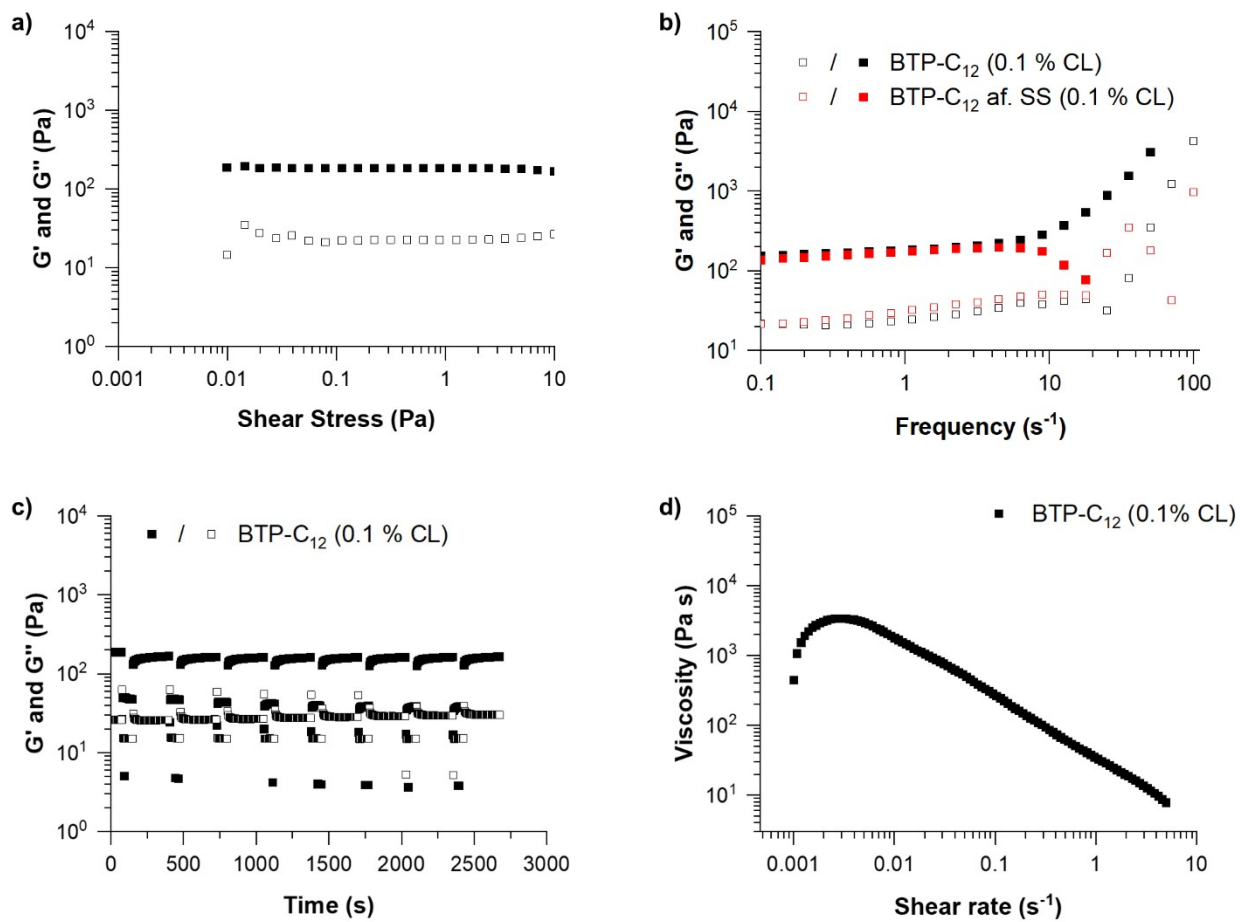

**Figure S8:** Stress sweep (a), Frequency sweep (b) before (black) and after (red) step strain measurements (c) and shear-viscosity measurements (d) of BTP-C<sub>12</sub>. The sample was prepared using a solvent switch from THF and contained 2.5 w% BTP-C<sub>12</sub> with 0.1 mol% CL<sub>12</sub>.

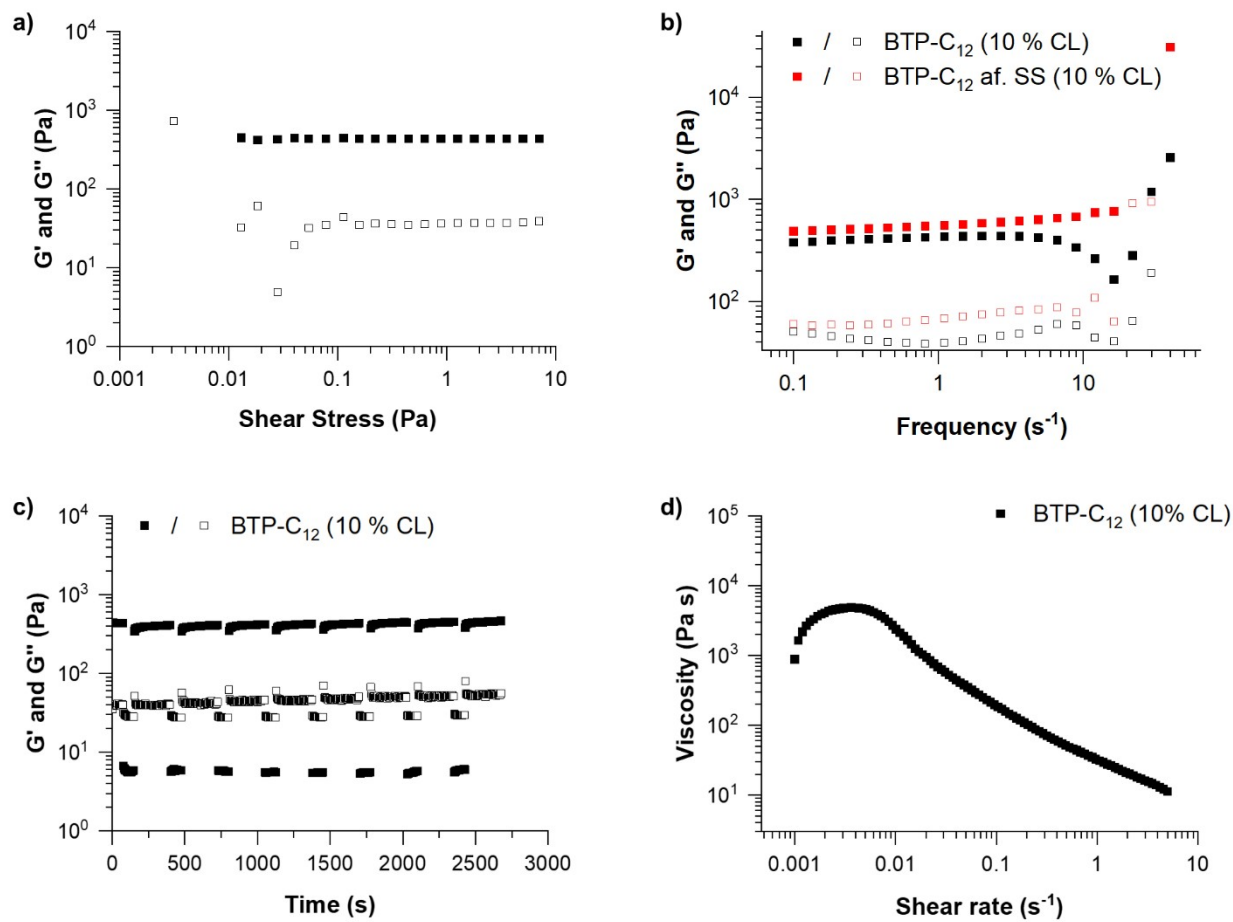

**Figure S9:** Stress sweep (a), Frequency sweep (b) before (black) and after (red) step strain measurements (c) and shear-viscosity measurements (d) of BTP-C<sub>12</sub>. The sample was prepared using a solvent switch from THF and contained 2.5 w% BTP-C<sub>12</sub> with 10 mol% CL<sub>12</sub>.

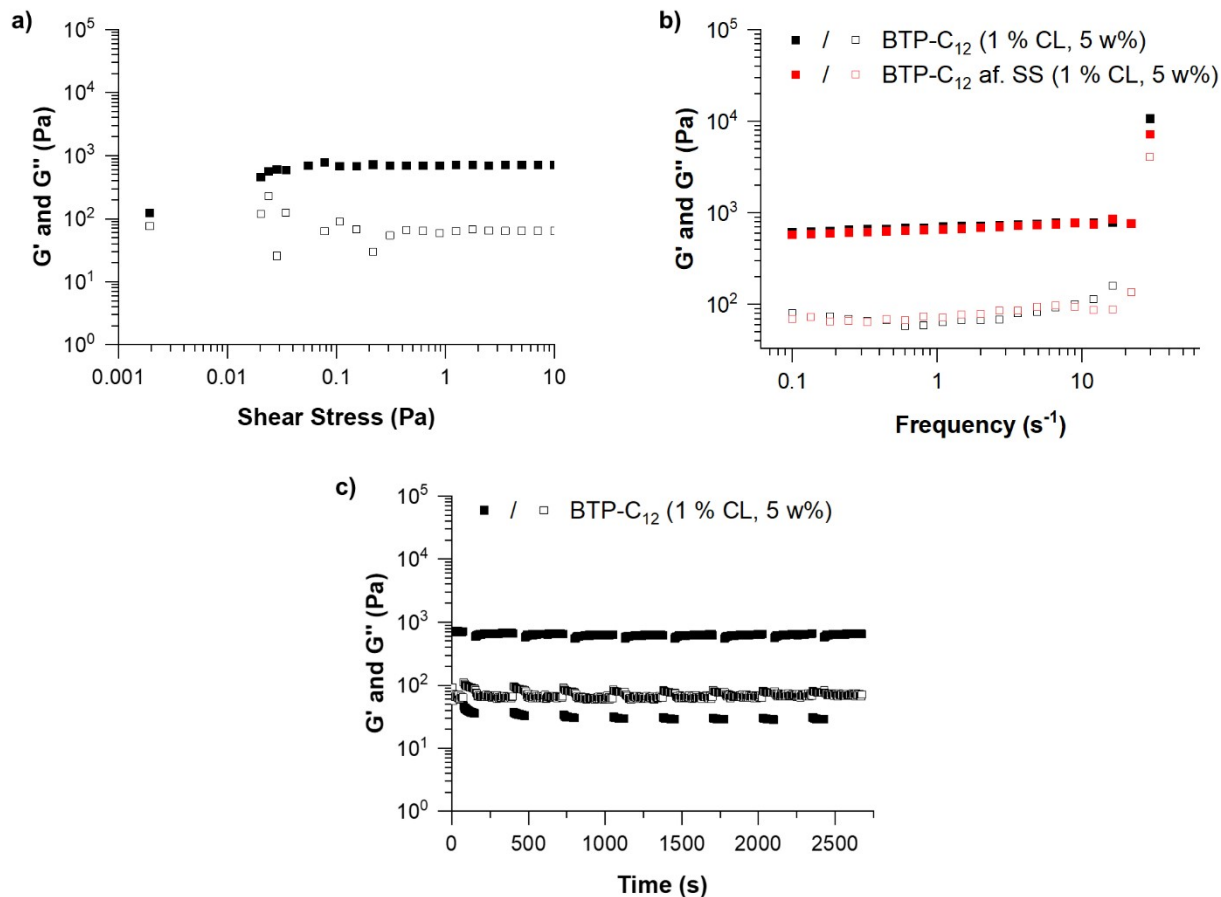

**Figure S10:** Stress sweep (a), Frequency sweep (b) before (black) and after (red) step strain measurements (c) of BTP-C<sub>12</sub>. The sample was prepared using a solvent switch from THF and contained 5 w% BTP-C<sub>12</sub> with 1 mol% CL<sub>12</sub>.

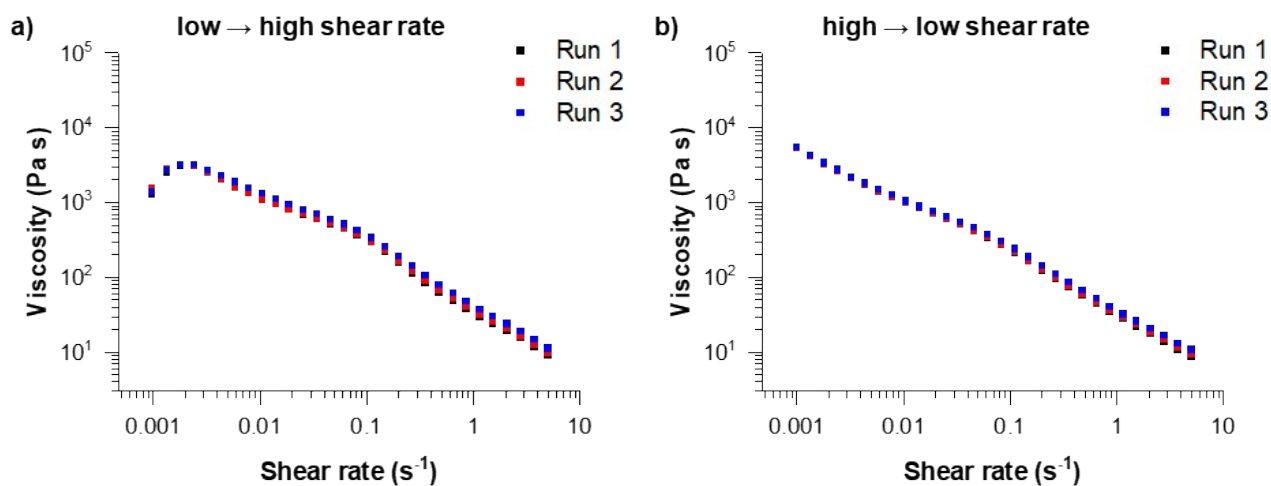

**Figure S11:** Multiple successive viscosity measurements in of BTP-C<sub>12</sub> (1 mol% CL) with a shear rate increase (a) and decrease (b) for each run.

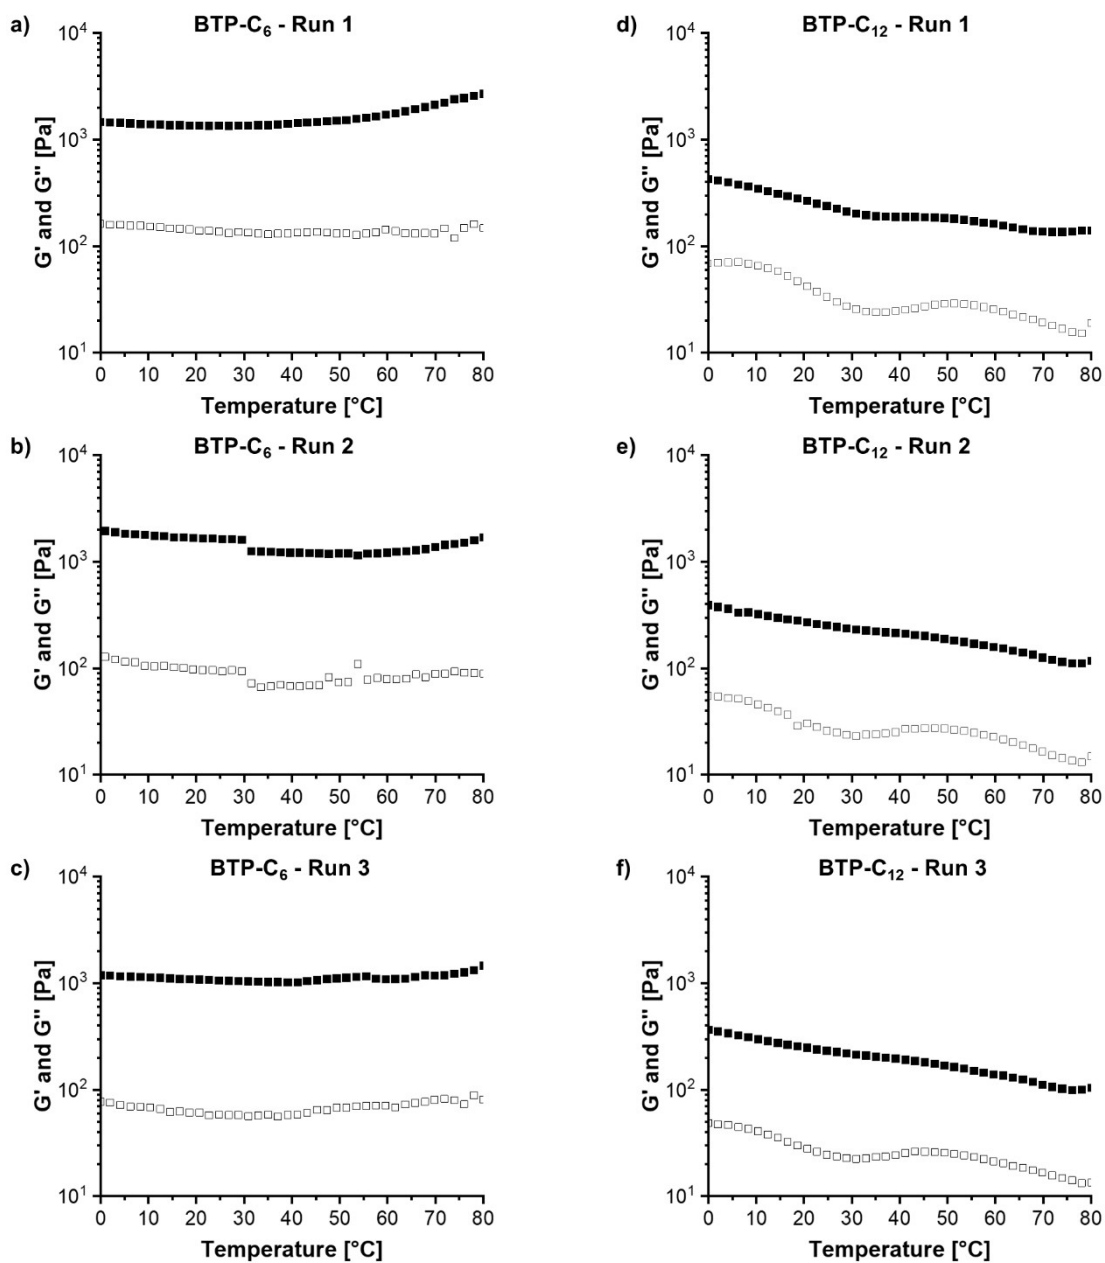

**Figure S12:** Repeated temperature sweep measurements performed on the same BTP-C<sub>6</sub> (a-c) and BTP-C<sub>12</sub> (d-f). The sample was prepared using a solvent switch from THF and contained 2.5 w% of the corresponding BTP with 1 mol% CL.

## 2.3 Biocompatibility tests

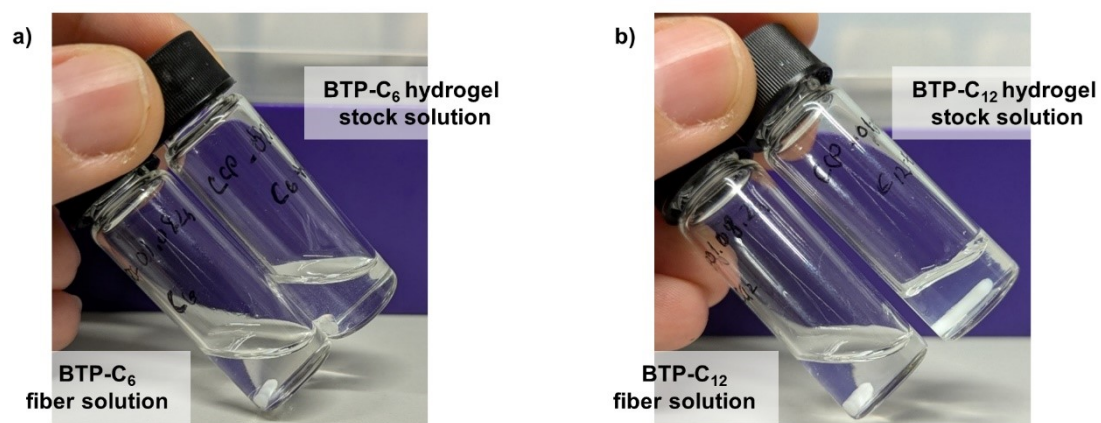

**Figure S13:** Following solvent switch, constitutional difference in BTP-C<sub>6</sub> (a) and BTP-C<sub>12</sub> (b) fiber and hydrogel stock solutions.

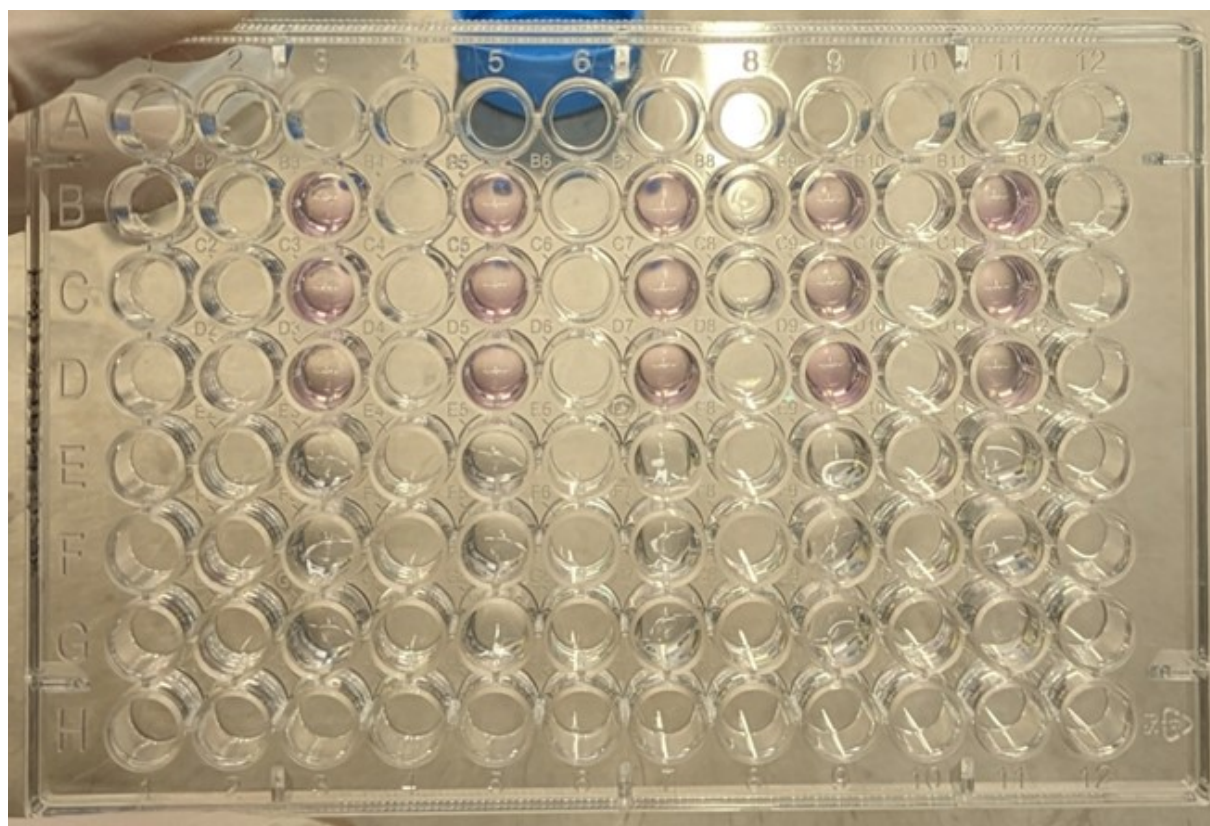

**Figure S14:** The overview of 96-well plate seeded with BTP-C<sub>6</sub> hydrogels (2.5 wt% and 1 mol% CL) after THF evaporation. Upper triplicates represent the gels treated D10 and the bottom triplicates depict the gels treated with PBS (1x).

**Table S1.** Mean and standard deviation values for relative metabolic activity (%)

| Sample     | Mean | Std. Deviation |
|------------|------|----------------|
| Control P1 | 100  | 3.9            |
| Control P2 | 100  | 2.8            |
| Control P3 | 100  | 4.9            |
| Control P4 | 100  | 4.2            |
| Gel P1     | 92.6 | 7.8            |
| Gel P2     | 87.7 | 11.7           |
| Gel P3     | 92.0 | 6.4            |
| Gel P4     | 88.2 | 4.8            |

### 3. Injection parameter calculation

Using the following equation one can calculate the pressure ( $P$ ) needed to inject the sample through a syringe.<sup>[2]</sup>

$$P = \left(\frac{3n+1}{n}\right)^n K \left(\frac{Q}{\pi}\right)^n \frac{2l}{R^{3n+1}}$$

$n$  = Fitted shear thinning parameter

$l$  = needle length

$K$  = consistency index

$R$  = needle radius

$Q$  = flow rate

To the force ( $F$ ) needed for extrusion was calculated using the following equation.

$$F = P\pi R_{\text{syringe}}^2$$

**Table S2.** Calculated values of the force needed to extrude the hydrogels (25 mg mL<sup>-1</sup>, 1 mol% CL) using different needles and a 1 mL syringe.

| Gauge | Sample | $n$ | $K$ | $Q$ | $l$ | $R$ | $R_{\text{syringe}}$ | $F$ |
|-------|--------|-----|-----|-----|-----|-----|----------------------|-----|
|-------|--------|-----|-----|-----|-----|-----|----------------------|-----|



|    |                     |      | [Pa s <sup>-1</sup> ] | [mL s <sup>-1</sup> ] | [mm] | [mm] | [mm] | [N]  |
|----|---------------------|------|-----------------------|-----------------------|------|------|------|------|
| 21 | BTP-C <sub>6</sub>  | 0.14 | 25.12                 | 0.1                   | 50   | 0.29 | 2.5  | 0.62 |
|    | BTP-C <sub>12</sub> | 0.16 | 25.48                 |                       |      |      |      | 0.76 |
| 23 | BTP-C <sub>6</sub>  | 0.14 | 25.12                 |                       | 12   | 0.17 |      | 0.33 |
|    | BTP-C <sub>12</sub> | 0.16 | 25.48                 |                       |      |      |      | 0.42 |
| 23 | BTP-C <sub>6</sub>  | 0.14 | 25.12                 |                       | 80   | 0.17 |      | 2.13 |
|    | BTP-C <sub>12</sub> | 0.16 | 25.48                 |                       |      |      |      | 2.72 |
| 27 | BTP-C <sub>6</sub>  | 0.14 | 25.12                 |                       | 12   | 0.11 |      | 0.63 |
|    | BTP-C <sub>12</sub> | 0.16 | 25.48                 |                       |      |      |      | 0.84 |

## 4. References

- [1] T. Klein, H. F. Ulrich, F. V. Gruschwitz, M. T. Kuchenbrod, R. Takahashi, S. Fujii, S. Hoepfner, I. Nischang, K. Sakurai, J. C. Brendel, *Impact of amino acids on the aqueous self-assembly of benzenetrispeptides into supramolecular polymer bottlebrushes*. *Polym. Chem.* **2020**, *11*, 6763-6771.
- [2] S. Correa, A. K. Grosskopf, H. Lopez Hernandez, D. Chan, A. C. Yu, L. M. Stapleton, E. A. Appel, *Translational Applications of Hydrogels*. *Chem. Rev.* **2021**, *121*, 11385-11457.
